# Supplementary material for: Single-Cell RNA Sequencing Analysis of Chicken Anterior Pituitary: A Bird’s-Eye View on Vertebrate Pituitary
Source: Front Physiol. 2021 Jun 29;12:562817. doi: 10.3389/fphys.2021.562817 (PMC8276247; doi:10.3389/fphys.2021.562817)
Supplement: Supplementary file 3 [file Data_Sheet_3.xlsx]

## Sheet: Gona
name	p_val	avg_log2FC	pct.1	pct.2	p_val_adj	change	gene	chromosome_name	description
HBA1	0	-4.29202	0.112	0.889	0	DOWN	HBA1	14	hemoglobin subunit alpha 1 [Source:NCBI gene;Acc:416652]
HBBA	0	-4.20049	0.038	0.665	0	DOWN	HBBA	1	hemoglobin beta, subunit A [Source:NCBI gene;Acc:396485]
GRP	1.109e-294	3.24452	1	0.792	1.32814e-290	UP	GRP	Z	gastrin releasing peptide [Source:NCBI gene;Acc:425213]
ENSGALG00000050515	7.68491e-266	-3.48111	0.169	0.807	9.20345e-262	DOWN	ENSGALG00000050515	KZ626833.1	collagen alpha-2(IV) chain-like [Source:NCBI gene;Acc:107051274]
ENSGALG00000042103	7.52014e-216	2.65147	0.97	0.317	9.00612e-212	UP	C5H11ORF96	5	chromosome 5 open reading frame, human C11orf96 [Source:NCBI gene;Acc:770209]
RLN3	2.34228e-198	5.60974	0.798	0	2.80511e-194	UP	RLN3	Z	relaxin 3 [Source:NCBI gene;Acc:427223]
HBAD	8.22174e-192	-3.39967	0.027	0.432	9.84635e-188	DOWN	HBAD	14	hemoglobin alpha, subunit D [Source:NCBI gene;Acc:416651]
HSPA8	6.80271e-168	-2.50479	0.432	0.851	8.14692e-164	DOWN	HSPA8	24	heat shock 70kDa protein 8 [Source:NCBI gene;Acc:395853]
HPGDS	3.59851e-162	3.96913	0.733	0.026	4.30958e-158	UP	HPGDS	4	hematopoietic prostaglandin D synthase [Source:NCBI gene;Acc:395863]
HSPA2	4.15594e-158	-2.43357	0.389	0.814	4.97715e-154	DOWN	HSPA2	5	heat shock 70kDa protein 2 [Source:NCBI gene;Acc:423504]
POMC	1.95735e-138	-3.36149	0.149	0.587	2.34413e-134	DOWN	POMC	3	proopiomelanocortin [Source:NCBI gene;Acc:422011]
CHGA	3.56507e-134	-1.32741	0.99	0.984	4.26952e-130	DOWN	CHGA	5	chromogranin A [Source:NCBI gene;Acc:423420]
ENSGALG00000045362	1.45816e-116	2.2441	0.765	0.173	1.74629e-112	UP	ENSGALG00000045362	5
COX3	6.02145e-112	-1.11021	0.923	0.993	7.21129e-108	DOWN	COX3	MT	cytochrome c oxidase subunit III [Source:NCBI gene;Acc:39116913]
PRL	4.08657e-109	-1.2736	0.863	0.971	4.89407e-105	DOWN	PRL	2	prolactin [Source:NCBI gene;Acc:396453]
HSP90AA1	6.54899e-107	-1.67172	0.572	0.821	7.84307e-103	DOWN	HSP90AA1	5	heat shock protein 90 alpha family class A member 1 [Source:NCBI gene;Acc:423463]
CPLX1	4.22961e-100	3.44864	0.531	0.007	5.06538e-96	UP	CPLX1	Z	complexin 1 [Source:NCBI gene;Acc:427286]
RPL37	2.05694e-95	-0.968242	0.941	0.969	2.46339e-91	DOWN	RPL37	Z	ribosomal protein L37 [Source:NCBI gene;Acc:427186]
ENSGALG00000004509	7.72228e-88	-1.14176	0.843	0.922	9.2482e-84	DOWN	UBB	19	polyubiquitin-C-like [Source:NCBI gene;Acc:101747587]
HEXB	2.01792e-85	3.25798	0.476	0.009	2.41666e-81	UP	HEXB	Z	hexosaminidase subunit beta [Source:NCBI gene;Acc:427204]
PIN4	3.83437e-85	1.58212	0.787	0.315	4.59204e-81	UP	PIN4	4	peptidylprolyl cis/trans isomerase, NIMA-interacting 4 [Source:NCBI gene;Acc:422134]
FOS	2.14722e-84	-1.41374	0.73	0.871	2.57151e-80	DOWN	FOS	5	Fos proto-oncogene, AP-1 transcription factor subunit [Source:NCBI gene;Acc:396512]
HSPA5	2.77316e-84	-1.90283	0.497	0.747	3.32114e-80	DOWN	HSPA5	17	heat shock 70kDa protein 5 (glucose-regulated protein, 78kDa) [Source:NCBI gene;Acc:396487]
JUN	8.82684e-81	-1.89444	0.298	0.617	1.0571e-76	DOWN	JUN	8	Jun proto-oncogene, AP-1 transcription factor subunit [Source:NCBI gene;Acc:424673]
ENSGALG00000049450	1.0561e-80	-2.45287	0.028	0.246	1.26479e-76	DOWN	ENSGALG00000049450	15	immunoglobulin lambda like polypeptide 1 [Source:HGNC Symbol;Acc:HGNC:5870]
HINTW	2.82789e-66	2.96266	0.385	0	3.38669e-62	UP	HINTW	W	histidine triad nucleotide binding protein W [Source:NCBI gene;Acc:395423]
ENSGALG00000015617	1.03734e-61	-1.01517	0.78	0.86	1.24232e-57	DOWN	RPS23	Z	ribosomal protein S23 [Source:NCBI gene;Acc:427323]
ATP6	1.1994e-57	-0.988822	0.8	0.883	1.4364e-53	DOWN	ATP6	MT	ATP synthase F0 subunit 6 [Source:NCBI gene;Acc:39116912]
EEF1A2	4.83411e-57	-2.05864	0.076	0.301	5.78933e-53	DOWN	EEF1A2	20	eukaryotic translation elongation factor 1 alpha 2 [Source:NCBI gene;Acc:419244]
COX7C	5.31221e-54	-1.13218	0.623	0.765	6.3619e-50	DOWN	COX7C	Z	cytochrome c oxidase subunit 7C [Source:NCBI gene;Acc:431629]
ENSGALG00000051598	6.01144e-53	1.29375	0.684	0.301	7.1993e-49	UP	ENSGALG00000051598	Z	small EDRK-rich factor 1-like [Source:NCBI gene;Acc:107052389]
LHB	1.73561e-51	-1.18642	1	0.974	2.07857e-47	DOWN	LHB
HSPE1	2.25491e-49	1.47096	0.55	0.173	2.70048e-45	UP	HSPE1	7	heat shock protein family E (Hsp10) member 1 [Source:NCBI gene;Acc:395948]
FAM189A2	2.25892e-48	1.69749	0.445	0.089	2.70528e-44	UP	FAM189A2	Z	family with sequence similarity 189 member A2 [Source:HGNC Symbol;Acc:HGNC:24820]
HSPB9	9.32234e-48	-1.79341	0.602	0.725	1.11644e-43	DOWN	HSPB9	27	heat shock protein family B (small) member 9 [Source:NCBI gene;Acc:428310]
ATP5I	1.01831e-47	-1.28244	0.444	0.641	1.21953e-43	DOWN	ATP5I	Z	ATP synthase, H+ transporting, mitochondrial Fo complex subunit E [Source:NCBI gene;Acc:769146]
NRSN1	1.13788e-46	2.1102	0.355	0.038	1.36273e-42	UP	NRSN1	2	neurensin 1 [Source:NCBI gene;Acc:420822]
PDIA3	2.52386e-46	1.10087	0.667	0.275	3.02258e-42	UP	PDIA3	10	protein disulfide isomerase family A member 3 [Source:NCBI gene;Acc:373899]
MT-CO1	7.34747e-46	-0.699249	0.923	0.958	8.79933e-42	DOWN	MT-CO1	MT	Cytochrome c oxidase subunit 1 [Source:UniProtKB/Swiss-Prot;Acc:P18943]
SLC38A7	1.92178e-45	1.42205	0.421	0.082	2.30152e-41	UP	SLC38A7	11	solute carrier family 38 member 7 [Source:NCBI gene;Acc:107052162]
ENSGALG00000043329	2.46357e-45	-1.80284	0.243	0.47	2.95037e-41	DOWN	ENSGALG00000043329	9	prothymosin, alpha [Source:NCBI gene;Acc:424931]
GOT2	9.15238e-44	1.3532	0.431	0.093	1.09609e-39	UP	GOT2	11	glutamic-oxaloacetic transaminase 2 [Source:NCBI gene;Acc:396533]
OTUB1	1.34179e-42	0.803507	0.88	0.594	1.60693e-38	UP	OTUB1	33	OTU deubiquitinase, ubiquitin aldehyde binding 1 [Source:NCBI gene;Acc:777320]
CHGB	1.33352e-41	2.08296	0.312	0.026	1.59703e-37	UP	CHGB	3	chromogranin B [Source:NCBI gene;Acc:421312]
ACTB	3.5493e-41	-1.08553	0.638	0.741	4.25064e-37	DOWN	ACTB	14	actin, beta [Source:NCBI gene;Acc:396526]
TSPAN6	7.99761e-41	1.81704	0.34	0.046	9.57794e-37	UP	TSPAN6	4	tetraspanin 6 [Source:NCBI gene;Acc:422262]
GPX4	1.97709e-40	1.25391	0.548	0.195	2.36777e-36	UP	GPX4	28	glutathione peroxidase 4 [Source:NCBI gene;Acc:374056]
JCHAIN	1.7775e-38	-1.63666	0.023	0.148	2.12873e-34	DOWN	JCHAIN	4	joining chain of multimeric IgA and IgM [Source:NCBI gene;Acc:374117]
RPS6	5.09494e-38	-1.16635	0.509	0.65	6.1017e-34	DOWN	RPS6	Z	ribosomal protein S6 [Source:NCBI gene;Acc:396148]
ENSGALG00000026970	9.54127e-37	2.08514	0.257	0.011	1.14266e-32	UP	ENSGALG00000026970	5	interferon-induced transmembrane protein 1-like [Source:NCBI gene;Acc:770612]
MT3	1.47857e-36	-2.00316	0.043	0.188	1.77074e-32	DOWN	MT3	11	metallothionein 3 [Source:NCBI gene;Acc:770592]
ZFPM1	2.62e-36	1.9524	0.273	0.02	3.13772e-32	UP	ZFPM1	11	zinc finger protein, FOG family member 1 [Source:NCBI gene;Acc:415835]
COTL1	7.4846e-35	1.96446	0.265	0.02	8.96356e-31	UP	COTL1	11	coactosin like F-actin binding protein 1 [Source:NCBI gene;Acc:768420]
COII	4.11242e-34	-0.605993	0.916	0.94	4.92503e-30	DOWN	COII	MT	Cytochrome c oxidase subunit 2 [Source:UniProtKB/Swiss-Prot;Acc:P18944]
ENSGALG00000010825	6.99371e-34	-1.66877	0.011	0.104	8.37567e-30	DOWN	ENSGALG00000010825
ND1	3.57123e-33	-1.13945	0.488	0.628	4.2769e-29	DOWN	ND1	MT	NADH dehydrogenase subunit 1 [Source:NCBI gene;Acc:39116926]
ENSGALG00000040263	1.58609e-32	1.89608	0.214	0	1.8995e-28	UP	ENSGALG00000040263	W	60S ribosomal protein L17 [Source:NCBI gene;Acc:107049046]
B2M	4.31951e-31	-1.42794	0.264	0.446	5.17305e-27	DOWN	B2M	10	beta-2-microglobulin [Source:NCBI gene;Acc:414830]
NR5A1	8.77145e-31	1.10957	0.411	0.124	1.05047e-26	UP	NR5A1	17	nuclear receptor subfamily 5 group A member 1 [Source:NCBI gene;Acc:395960]
SORL1	2.12446e-30	1.56322	0.284	0.046	2.54426e-26	UP	SORL1	24	sortilin related receptor 1 [Source:NCBI gene;Acc:395998]
ENSGALG00000053921	2.78909e-30	-1.13832	0.029	0.142	3.34022e-26	DOWN	ENSGALG00000053921	3	uncharacterized LOC112532140 [Source:NCBI gene;Acc:112532140]
BLB2	3.78543e-30	-1.34321	0.027	0.138	4.53343e-26	DOWN	BLB2	16	Major histocompatibility complex class II beta chain BLB2, (similar to HLA class II, D beta chain) [Source:NCBI gene;Acc:101747454]
ENSGALG00000053886	6.58411e-30	-1.12797	0.031	0.148	7.88513e-26	DOWN	ENSGALG00000053886	Z
ENSGALG00000037018	1.71574e-28	1.57026	0.288	0.058	2.05477e-24	UP	USP36	18	ubiquitin specific peptidase 36 [Source:NCBI gene;Acc:426457]
ENSGALG00000040371	9.47872e-28	1.44651	0.273	0.049	1.13517e-23	UP	ENSGALG00000040371	5
MYLK	1.46195e-27	-1.61115	0.038	0.155	1.75084e-23	DOWN	MYLK
HIST1H46	1.61408e-27	0.893082	0.48	0.204	1.93302e-23	UP	HIST1H46	1	histone cluster 1, H4-VI, germinal H4 (similar to human histone cluster 1, class H4 genes) [Source:NCBI gene;Acc:417946]
COX6C	2.26006e-27	0.777721	0.661	0.357	2.70665e-23	UP	COX6C	2	cytochrome c oxidase subunit 6C [Source:NCBI gene;Acc:420243]
TIMP2	4.44648e-27	1.31201	0.287	0.058	5.32511e-23	UP	TIMP2	18	TIMP metallopeptidase inhibitor 2 [Source:NCBI gene;Acc:374178]
CYTB	5.26581e-27	-0.829841	0.596	0.703	6.30633e-23	DOWN	CYTB	MT	cytochrome b [Source:NCBI gene;Acc:39116918]
ENSGALG00000007147	1.04526e-26	1.98568	0.19	0.005	1.2518e-22	UP	ENSGALG00000007147	15	dynein light chain 2 cytoplasmic [Source:NCBI gene;Acc:770215]
TNIP1	1.65106e-25	1.16933	0.315	0.08	1.97731e-21	UP	TNIP1	13	TNFAIP3 interacting protein 1 [Source:NCBI gene;Acc:100858009]
LIPA	4.06635e-25	1.71229	0.19	0.011	4.86986e-21	UP	LIPA	6	lipase A, lysosomal acid type [Source:NCBI gene;Acc:423789]
BSG	1.78919e-24	0.905253	0.412	0.149	2.14273e-20	UP	BSG	28	basigin (Ok blood group) [Source:NCBI gene;Acc:770363]
ND6	3.001e-24	-0.80905	0.667	0.741	3.594e-20	DOWN	ND6	MT	NADH dehydrogenase subunit 6 [Source:NCBI gene;Acc:39116944]
ND3	3.506e-24	-0.852463	0.59	0.674	4.19879e-20	DOWN	ND3	MT	NADH dehydrogenase subunit 3 [Source:NCBI gene;Acc:39116938]
MYL6	4.89889e-24	0.844803	0.463	0.197	5.86691e-20	UP	MYL6	33	myosin, light chain 6, alkali, smooth muscle and non-muscle [Source:NCBI gene;Acc:100996929]
DPP7	3.06898e-23	1.15426	0.298	0.082	3.67541e-19	UP	DPP7	17	dipeptidyl peptidase 7 [Source:NCBI gene;Acc:417297]
SCG3	1.13218e-22	0.810058	0.46	0.195	1.35589e-18	UP	SCG3	10	secretogranin III [Source:NCBI gene;Acc:415424]
RASA4B	1.595e-22	1.65088	0.174	0.011	1.91017e-18	UP	RASA4B	19	RAS p21 protein activator 4B [Source:NCBI gene;Acc:417513]
RRBP1	1.79981e-22	1.00342	0.42	0.179	2.15546e-18	UP	RRBP1	3	ribosome binding protein 1 [Source:NCBI gene;Acc:396414]
AMY1A	2.01148e-22	1.33541	0.22	0.036	2.40895e-18	UP	AMY1A	8	amylase, alpha 1A; hepatic [Source:NCBI gene;Acc:414139]
FHL3	2.52129e-22	1.14524	0.271	0.067	3.01949e-18	UP	FHL3	23	four and a half LIM domains 3 [Source:NCBI gene;Acc:419607]
SCCPDH	4.00552e-22	1.35377	0.208	0.031	4.797e-18	UP	SCCPDH	3	saccharopine dehydrogenase (putative) [Source:NCBI gene;Acc:421485]
YBX1	8.85155e-22	0.753005	0.525	0.251	1.06006e-17	UP	YBX1	21	Y-box binding protein 1 [Source:NCBI gene;Acc:386575]
UMOD	1.75557e-21	1.7104	0.146	0	2.10247e-17	UP	UMOD	11	uromodulin [Source:NCBI gene;Acc:404754]
EGR1	3.44758e-21	-1.10387	0.411	0.526	4.12882e-17	DOWN	EGR1	13	early growth response 1 [Source:NCBI gene;Acc:373931]
PCBD2	3.71537e-21	0.908746	0.365	0.14	4.44952e-17	UP	PCBD2	13	pterin-4 alpha-carbinolamine dehydratase 2 [Source:NCBI gene;Acc:374030]
ENSGALG00000045199	3.79915e-21	0.784775	0.43	0.182	4.54986e-17	UP	ENSGALG00000045199	5	dispanin subfamily A member 2b-like [Source:NCBI gene;Acc:107053353]
RAD23B	4.34637e-21	1.22577	0.225	0.044	5.20521e-17	UP	RAD23B	Z	RAD23 homolog B, nucleotide excision repair protein [Source:NCBI gene;Acc:431623]
FTH1	6.31637e-21	-0.647144	0.768	0.78	7.56448e-17	DOWN	FTH1	5	ferritin heavy chain 1 [Source:NCBI gene;Acc:395970]
ENSGALG00000005907	7.11655e-21	0.827923	0.456	0.206	8.52278e-17	UP	RPN1	12	ribophorin I [Source:NCBI gene;Acc:416017]
TIMM13	1.1426e-20	0.710968	0.578	0.311	1.36838e-16	UP	TIMM13	28	translocase of inner mitochondrial membrane 13 [Source:NCBI gene;Acc:100859352]
ENSGALG00000006543	3.86599e-20	1.22131	0.22	0.046	4.62991e-16	UP	PFKL	9	phosphofructokinase, liver type [Source:NCBI gene;Acc:769850]
RPL17	5.54202e-20	-0.930594	0.517	0.594	6.63713e-16	DOWN	RPL17	Z	ribosomal protein L17 [Source:NCBI gene;Acc:426845]
ND5	1.91414e-19	-1.12974	0.318	0.444	2.29238e-15	DOWN	ND5	MT	NADH-ubiquinone oxidoreductase chain 5 [Source:UniProtKB/Swiss-Prot;Acc:P18940]
PKLR	3.95751e-19	0.730664	0.433	0.199	4.73951e-15	UP	PKLR	10	pyruvate kinase, liver and RBC [Source:NCBI gene;Acc:396456]
RPS21	1.00151e-18	-0.537468	0.818	0.818	1.1994e-14	DOWN	RPS21	20	ribosomal protein S21 [Source:NCBI gene;Acc:419228]
BAG3	3.77896e-18	-1.50338	0.076	0.188	4.52568e-14	DOWN	BAG3	6	BCL2 associated athanogene 3 [Source:NCBI gene;Acc:423931]
ENSGALG00000007606	4.22287e-18	0.875666	0.293	0.1	5.05731e-14	UP	PGAM1	6	phosphoglycerate mutase 1 [Source:NCBI gene;Acc:428969]
RPL6	5.30564e-18	0.516861	0.786	0.541	6.35403e-14	UP	RPL6	15	ribosomal protein L6 [Source:NCBI gene;Acc:373957]
GNRHR	9.56981e-18	0.80568	0.339	0.133	1.14608e-13	UP	GNRHR	10	gonadotropin-releasing hormone receptor [Source:NCBI gene;Acc:427517]
ENSGALG00000052986	2.50321e-17	0.879464	0.282	0.097	2.99784e-13	UP	ENSGALG00000052986	9
CYP11A1	5.04077e-17	1.4216	0.123	0.004	6.03683e-13	UP	CYP11A1	10	cytochrome P450 family 11 subfamily A member 1 [Source:NCBI gene;Acc:414838]
ABCC4	5.56553e-17	1.29721	0.141	0.013	6.66528e-13	UP	ABCC4	1	ATP binding cassette subfamily C member 4 [Source:NCBI gene;Acc:418791]
GPC4	7.20381e-17	0.836167	0.253	0.078	8.62728e-13	UP	GPC4	4	glypican 4 [Source:NCBI gene;Acc:422234]
H3F3B	1.56582e-16	-0.826804	0.519	0.579	1.87522e-12	DOWN	H3F3B	18	H3 histone, family 3B [Source:NCBI gene;Acc:396233]
DNAJA4	1.78108e-16	-1.40485	0.066	0.166	2.13303e-12	DOWN	DNAJA4
RPL35	1.91594e-16	-0.56834	0.731	0.743	2.29453e-12	DOWN	RPL35	17	ribosomal protein L35 [Source:NCBI gene;Acc:374133]
FAM213A	3.34546e-16	1.24564	0.126	0.007	4.00652e-12	UP	FAM213A	6	family with sequence similarity 213 member A [Source:NCBI gene;Acc:423625]
ENSGALG00000007936	4.31619e-16	0.721318	0.287	0.104	5.16907e-12	UP	PGK2	4	phosphoglycerate kinase 2 [Source:NCBI gene;Acc:395833]
TIMM10	4.51737e-16	0.676226	0.364	0.158	5.41e-12	UP	TIMM10	5	translocase of inner mitochondrial membrane 10 [Source:NCBI gene;Acc:425202]
ENSGALG00000023279	4.55064e-16	1.01528	0.207	0.055	5.44984e-12	UP	EPN3	18	epsin 3 [Source:NCBI gene;Acc:100859290]
ND4	7.23554e-16	-0.771799	0.536	0.607	8.66528e-12	DOWN	ND4	MT	NADH dehydrogenase subunit 4 [Source:NCBI gene;Acc:39116916]
ENSGALG00000016251	1.92851e-15	0.984939	0.164	0.031	2.30959e-11	UP	ENSGALG00000016251	1	tetraspanin 7 [Source:NCBI gene;Acc:418577]
EIF1	2.23745e-15	-0.932571	0.397	0.486	2.67957e-11	DOWN	EIF1	27	eukaryotic translation initiation factor 1 [Source:NCBI gene;Acc:420037]
TSHB	3.63514e-15	1.41934	0.174	0.038	4.35344e-11	UP	TSHB	26	thyroid stimulating hormone beta [Source:NCBI gene;Acc:395937]
BTG2	3.98768e-15	-1.02812	0.331	0.437	4.77565e-11	DOWN	BTG2	26	BTG anti-proliferation factor 2 [Source:NCBI gene;Acc:419932]
AHCYL1	5.05151e-15	0.754029	0.251	0.087	6.04969e-11	UP	AHCYL1	26	adenosylhomocysteinase like 1 [Source:NCBI gene;Acc:419803]
ENSGALG00000033530	6.02903e-15	0.695351	0.276	0.104	7.22037e-11	UP	ENSGALG00000033530	27	granulin precursor [Source:HGNC Symbol;Acc:HGNC:4601]
ENSGALG00000032730	6.60108e-15	0.694213	0.27	0.102	7.90546e-11	UP	NOP56	4	NOP56 ribonucleoprotein [Source:NCBI gene;Acc:426574]
SLC25A5	1.91573e-14	0.697444	0.254	0.091	2.29428e-10	UP	SLC25A5	4	solute carrier family 25 member 5 [Source:NCBI gene;Acc:772225]
RCOR3	4.20204e-14	0.719393	0.251	0.091	5.03236e-10	UP	RCOR3	3	REST corepressor 3 [Source:NCBI gene;Acc:421380]
ENSGALG00000001805	2.0027e-13	0.698537	0.268	0.106	2.39843e-09	UP	ENSGALG00000001805	18	matrix remodeling associated 7 [Source:NCBI gene;Acc:769894]
RPL23A	2.2005e-13	-0.564466	0.68	0.703	2.63532e-09	DOWN	RPL23A	19	ribosomal protein L23a [Source:NCBI gene;Acc:417574]
ERGIC3	3.20626e-13	0.908468	0.16	0.038	3.83982e-09	UP	ERGIC3	20	ERGIC and golgi 3 [Source:NCBI gene;Acc:419137]
RPS3	3.37542e-13	-0.586014	0.606	0.634	4.0424e-09	DOWN	RPS3	1	ribosomal protein S3 [Source:NCBI gene;Acc:419069]
PLBD1	4.33971e-13	0.835051	0.154	0.035	5.19724e-09	UP	PLBD1	1	phospholipase B domain containing 1 [Source:NCBI gene;Acc:417967]
CKB	6.59741e-13	0.963096	0.148	0.033	7.90105e-09	UP	CKB	5	creatine kinase B [Source:NCBI gene;Acc:396248]
TPT1	1.30951e-12	-0.702385	0.539	0.574	1.56827e-08	DOWN	TPT1	1	tumor protein, translationally-controlled 1 [Source:NCBI gene;Acc:396363]
TM9SF2L	1.47841e-12	1.1709	0.109	0.013	1.77054e-08	UP	TM9SF2L
MT-ND2	2.01701e-12	-0.955066	0.236	0.342	2.41557e-08	DOWN	MT-ND2	MT	NADH-ubiquinone oxidoreductase chain 2 [Source:UniProtKB/Swiss-Prot;Acc:P18937]
PPP1R1C	2.55072e-12	0.727116	0.167	0.046	3.05474e-08	UP	PPP1R1C	7	protein phosphatase 1 regulatory inhibitor subunit 1C [Source:NCBI gene;Acc:424117]
HIST1H3H	2.79223e-12	0.861091	0.141	0.033	3.34397e-08	UP	HIST1H3H	1	histone cluster 1 H3 family member h [Source:NCBI gene;Acc:100858681]
GADD45A	1.88011e-11	0.649521	0.228	0.091	2.25162e-07	UP	GADD45A	8	growth arrest and DNA damage inducible alpha [Source:NCBI gene;Acc:693255]
HERPUD1	3.08419e-11	-1.14492	0.162	0.26	3.69362e-07	DOWN	HERPUD1	11	homocysteine inducible ER protein with ubiquitin like domain 1 [Source:NCBI gene;Acc:415644]
MT4	5.051e-11	-1.61349	0.07	0.149	6.04908e-07	DOWN	MT4	11	metallothionein 4 [Source:NCBI gene;Acc:396212]
H3F3C	7.10854e-11	-1.21047	0.162	0.253	8.51318e-07	DOWN	H3F3C	3	H3 histone, family 3C [Source:NCBI gene;Acc:427887]
S100A6	7.3301e-11	0.518648	0.134	0.033	8.77852e-07	UP	S100A6	25	S100 calcium binding protein A6 [Source:NCBI gene;Acc:373951]
CALM1	1.57832e-10	-0.851127	0.291	0.375	1.8902e-06	DOWN	CALM1	5	calmodulin 1 (phosphorylase kinase, delta) [Source:NCBI gene;Acc:396523]
TXN	1.66004e-10	-0.618571	0.56	0.581	1.98806e-06	DOWN	TXN	Z	thioredoxin [Source:NCBI gene;Acc:396437]
CALM2	1.76714e-10	-0.713525	0.428	0.486	2.11632e-06	DOWN	CALM2	3	calmodulin 2 [Source:NCBI gene;Acc:395855]
GMPPB	2.09574e-10	0.782765	0.141	0.04	2.50986e-06	UP	GMPPB	12	GDP-mannose pyrophosphorylase B [Source:NCBI gene;Acc:415924]
Pou5f3	2.34885e-10	0.797752	0.12	0.027	2.81298e-06	UP	Pou5f3	17	POU domain class 5 transcription factor 3 [Source:NCBI gene;Acc:427781]
YWHAB	2.48242e-10	0.515997	0.216	0.087	2.97294e-06	UP	YWHAB	20	tyrosine 3-monooxygenase/tryptophan 5-monooxygenase activation protein beta [Source:NCBI gene;Acc:419190]
ENSGALG00000055092	4.30247e-10	0.601143	0.213	0.089	5.15264e-06	UP	ENSGALG00000055092	25	DDB1 and CUL4 associated factor 11 [Source:NCBI gene;Acc:112530307]
TMSB4X	4.75682e-10	-0.549724	0.739	0.725	5.69676e-06	DOWN	TMSB4X	1	thymosin beta 4, X-linked [Source:NCBI gene;Acc:408047]
LHFPL5	4.97508e-10	0.835326	0.12	0.029	5.95815e-06	UP	LHFPL5	26	lipoma HMGIC fusion partner-like 5 [Source:NCBI gene;Acc:378916]
FSHB	7.61367e-10	-1.05562	0.299	0.372	9.11813e-06	DOWN	FSHB	5	follicle stimulating hormone beta subunit [Source:NCBI gene;Acc:374108]
ENSGALG00000033789	8.87184e-10	-0.966971	0.393	0.434	1.06249e-05	DOWN	HSP90B1	1	heat shock protein 90 beta family member 1 [Source:NCBI gene;Acc:374163]
SCD	9.30124e-10	0.652738	0.174	0.064	1.11392e-05	UP	SCD	6	stearoyl-CoA desaturase [Source:NCBI gene;Acc:395706]
GRAMD2A	1.05409e-09	0.694167	0.144	0.047	1.26238e-05	UP	GRAMD2A
RASD1	1.68794e-09	-1.24357	0.094	0.173	2.02147e-05	DOWN	RASD1	14	ras related dexamethasone induced 1 [Source:NCBI gene;Acc:416507]
RPS16	1.73273e-09	-0.530423	0.57	0.596	2.07512e-05	DOWN	RPS16	1	ribosomal protein S16 [Source:NCBI gene;Acc:417871]
LDHB	1.73386e-09	0.601596	0.146	0.047	2.07647e-05	UP	LDHB	1	lactate dehydrogenase B [Source:NCBI gene;Acc:373997]
REEP5	2.28858e-09	-0.987142	0.056	0.124	2.74081e-05	DOWN	REEP5	Z	receptor accessory protein 5 [Source:NCBI gene;Acc:770021]
HINT2	4.02648e-09	-1.05409	0.129	0.209	4.82212e-05	DOWN	HINT2	Z	histidine triad nucleotide binding protein 2 [Source:NCBI gene;Acc:395424]
ENSGALG00000045738	6.91148e-09	-1.05346	0.042	0.1	8.27719e-05	DOWN	ENSGALG00000045738	27	CDGSH iron sulfur domain 3 [Source:NCBI gene;Acc:100857847]
LRP11	7.04677e-09	0.524365	0.198	0.086	8.43921e-05	UP	LRP11	3	LDL receptor related protein 11 [Source:NCBI gene;Acc:421629]
KLHL36	8.30305e-09	0.5924	0.123	0.036	9.94373e-05	UP	KLHL36
DHCR24	1.10088e-08	0.563055	0.164	0.064	0.000131841	UP	DHCR24	8	24-dehydrocholesterol reductase [Source:NCBI gene;Acc:424661]
ENSGALG00000049751	1.12358e-08	0.569889	0.156	0.062	0.00013456	UP	ENSGALG00000049751	1	histone cluster 1, H2bf [Source:NCBI gene;Acc:769973]
ENSGALG00000028135	1.20945e-08	-0.970247	0.043	0.1	0.000144844	DOWN	ENSGALG00000028135
FNBP1L	1.26561e-08	0.800572	0.105	0.027	0.000151569	UP	FNBP1L
UQCRHL	1.36731e-08	-0.877017	0.267	0.339	0.000163749	DOWN	UQCRHL	8	ubiquinol-cytochrome c reductase hinge protein like [Source:NCBI gene;Acc:771939]
COQ9	1.97276e-08	0.700998	0.124	0.04	0.000236258	UP	COQ9	11	coenzyme Q9 [Source:NCBI gene;Acc:415636]
AP2M1	2.11129e-08	0.55957	0.161	0.064	0.000252848	UP	AP2M1
ENSGALG00000014726	2.15039e-08	-0.922772	0.052	0.113	0.00025753	DOWN	RAB3C	Z	RAB3C, member RAS oncogene family [Source:NCBI gene;Acc:770370]
ENSGALG00000041163	2.31248e-08	0.696486	0.104	0.027	0.000276943	UP	ENSGALG00000041163
ENSGALG00000009107	2.33321e-08	0.692767	0.115	0.035	0.000279426	UP	NRXN1	3	neurexin 1 [Source:NCBI gene;Acc:395398]
CHCHD2P9	2.37644e-08	-0.857726	0.493	0.505	0.000284602	DOWN	CHCHD2P9	19	coiled-coil-helix-coiled-coil-helix domain containing 2 pseudogene 9 [Source:NCBI gene;Acc:417544]
PRKCSH	4.96051e-08	0.583928	0.122	0.04	0.00059407	UP	PRKCSH	KZ626839.1	uncharacterized LOC107050604 [Source:NCBI gene;Acc:107050604]
ENSGALG00000014589	6.50251e-08	0.566135	0.119	0.038	0.000778741	UP	ENSGALG00000014589	28	AN1-type zinc finger protein 5-like [Source:NCBI gene;Acc:426626]

## Sheet: Lac
name	p_val	avg_log2FC	pct.1	pct.2	p_val_adj	change	gene	chromosome_name	description
LHB	0	-1.63371	0.351	0.796	0	DOWN	LHB
ENSGALG00000049450	0	-2.13517	0.034	0.358	0	DOWN	ENSGALG00000049450	15	immunoglobulin lambda like polypeptide 1 [Source:HGNC Symbol;Acc:HGNC:5870]
ENSGALG00000050515	0	-3.25366	0.143	0.872	0	DOWN	ENSGALG00000050515	KZ626833.1	collagen alpha-2(IV) chain-like [Source:NCBI gene;Acc:107051274]
COX7C	0	-1.31035	0.498	0.853	0	DOWN	COX7C	Z	cytochrome c oxidase subunit 7C [Source:NCBI gene;Acc:431629]
HBA1	0	-4.09266	0.084	0.933	0	DOWN	HBA1	14	hemoglobin subunit alpha 1 [Source:NCBI gene;Acc:416652]
HBAD	0	-3.12654	0.02	0.539	0	DOWN	HBAD	14	hemoglobin alpha, subunit D [Source:NCBI gene;Acc:416651]
RPL37	0	-0.674759	0.947	0.988	0	DOWN	RPL37	Z	ribosomal protein L37 [Source:NCBI gene;Acc:427186]
ENSGALG00000026970	0	2.66492	0.337	0.015	0	UP	ENSGALG00000026970	5	interferon-induced transmembrane protein 1-like [Source:NCBI gene;Acc:770612]
GRP	0	2.88074	0.946	0.364	0	UP	GRP	Z	gastrin releasing peptide [Source:NCBI gene;Acc:425213]
HSPA8	0	-1.28067	0.595	0.884	0	DOWN	HSPA8	24	heat shock 70kDa protein 8 [Source:NCBI gene;Acc:395853]
RPS6	0	-0.970128	0.613	0.858	0	DOWN	RPS6	Z	ribosomal protein S6 [Source:NCBI gene;Acc:396148]
POMC	0	-2.31711	0.146	0.681	0	DOWN	POMC	3	proopiomelanocortin [Source:NCBI gene;Acc:422011]
HBBA	0	-3.90234	0.024	0.747	0	DOWN	HBBA	1	hemoglobin beta, subunit A [Source:NCBI gene;Acc:396485]
ENSGALG00000040263	0	2.51605	0.303	0	0	UP	ENSGALG00000040263	W	60S ribosomal protein L17 [Source:NCBI gene;Acc:107049046]
HSPA5	0	-1.79874	0.252	0.616	0	DOWN	HSPA5	17	heat shock 70kDa protein 5 (glucose-regulated protein, 78kDa) [Source:NCBI gene;Acc:396487]
HINTW	0	3.50137	0.463	0	0	UP	HINTW	W	histidine triad nucleotide binding protein W [Source:NCBI gene;Acc:395423]
ENSGALG00000015617	0	-0.998988	0.751	0.941	0	DOWN	RPS23	Z	ribosomal protein S23 [Source:NCBI gene;Acc:427323]
HSPB9	0	1.16575	0.897	0.797	0	UP	HSPB9	27	heat shock protein family B (small) member 9 [Source:NCBI gene;Acc:428310]
H3F3B	8.58964e-285	0.904203	0.946	0.895	1.02869e-280	UP	H3F3B	18	H3 histone, family 3B [Source:NCBI gene;Acc:396233]
ENSGALG00000014725	3.99975e-279	-1.71506	0.147	0.463	4.7901e-275	DOWN	PLK2	Z	polo like kinase 2 [Source:NCBI gene;Acc:427150]
ATP5I	2.92333e-244	-1.17756	0.293	0.621	3.50098e-240	DOWN	ATP5I	Z	ATP synthase, H+ transporting, mitochondrial Fo complex subunit E [Source:NCBI gene;Acc:769146]
CKB	1.05539e-216	1.83344	0.403	0.128	1.26393e-212	UP	CKB	5	creatine kinase B [Source:NCBI gene;Acc:396248]
PNRC1	1.06091e-214	0.855379	0.82	0.667	1.27055e-210	UP	PNRC1	3	proline rich nuclear receptor coactivator 1 [Source:NCBI gene;Acc:421817]
HSP90AA1	1.82787e-211	-0.76633	0.657	0.87	2.18906e-207	DOWN	HSP90AA1	5	heat shock protein 90 alpha family class A member 1 [Source:NCBI gene;Acc:423463]
CHGB	1.57989e-201	1.78172	0.441	0.174	1.89208e-197	UP	CHGB	3	chromogranin B [Source:NCBI gene;Acc:421312]
RPL17	1.29562e-188	-0.684223	0.709	0.869	1.55164e-184	DOWN	RPL17	Z	ribosomal protein L17 [Source:NCBI gene;Acc:426845]
ENSGALG00000053886	9.5234e-161	-1.06703	0.072	0.272	1.14052e-156	DOWN	ENSGALG00000053886	Z
ENSGALG00000033789	4.27271e-159	-1.35678	0.136	0.361	5.117e-155	DOWN	HSP90B1	1	heat shock protein 90 beta family member 1 [Source:NCBI gene;Acc:374163]
JCHAIN	8.38014e-152	-1.38328	0.022	0.169	1.00361e-147	DOWN	JCHAIN	4	joining chain of multimeric IgA and IgM [Source:NCBI gene;Acc:374117]
DUSP1	1.34946e-151	1.38252	0.463	0.241	1.61611e-147	UP	DUSP1	13	dual specificity phosphatase 1 [Source:NCBI gene;Acc:374192]
ENSGALG00000053921	4.81395e-139	-0.921041	0.069	0.249	5.76518e-135	DOWN	ENSGALG00000053921	3	uncharacterized LOC112532140 [Source:NCBI gene;Acc:112532140]
HINT2	2.65406e-128	-1.0073	0.166	0.382	3.17851e-124	DOWN	HINT2	Z	histidine triad nucleotide binding protein 2 [Source:NCBI gene;Acc:395424]
CD24	8.09932e-118	0.64893	0.833	0.732	9.69974e-114	UP	CD24	3	CD24 molecule [Source:NCBI gene;Acc:100859742]
MT-CO1	3.82256e-117	-0.516836	0.843	0.944	4.5779e-113	DOWN	MT-CO1	MT	Cytochrome c oxidase subunit 1 [Source:UniProtKB/Swiss-Prot;Acc:P18943]
PDK4	1.27592e-112	-1.09262	0.149	0.338	1.52805e-108	DOWN	PDK4	2	pyruvate dehydrogenase kinase 4 [Source:NCBI gene;Acc:420570]
HIST1H3H	3.58397e-112	1.50461	0.208	0.052	4.29216e-108	UP	HIST1H3H	1	histone cluster 1 H3 family member h [Source:NCBI gene;Acc:100858681]
TXN	9.78797e-112	-0.756137	0.287	0.516	1.17221e-107	DOWN	TXN	Z	thioredoxin [Source:NCBI gene;Acc:396437]
HIST1H46L2	1.03125e-107	1.84082	0.119	0.005	1.23503e-103	UP	HIST1H46L2
HIST1H110	1.86126e-107	1.63351	0.168	0.03	2.22905e-103	UP	HIST1H110	1	histone cluster 1, H1.10 (similar to human histone cluster 1, class H1 genes) [Source:NCBI gene;Acc:417948]
FAU	2.38143e-106	0.513469	0.851	0.777	2.852e-102	UP	FAU	33	FAU, ubiquitin like and ribosomal protein S30 fusion [Source:NCBI gene;Acc:101749142]
HSPB1	3.52254e-105	-0.923633	0.215	0.419	4.2186e-101	DOWN	HSPB1	19	heat shock protein family B (small) member 1 [Source:NCBI gene;Acc:396227]
S100A10	2.62689e-97	-1.1813	0.029	0.14	3.14596e-93	DOWN	S100A10	25	S100 calcium binding protein A10 [Source:NCBI gene;Acc:396506]
STMN1	3.38888e-97	1.09369	0.379	0.206	4.05852e-93	UP	STMN1	23	stathmin 1 [Source:NCBI gene;Acc:396057]
SCG3	5.55191e-96	0.897263	0.49	0.319	6.64896e-92	UP	SCG3	10	secretogranin III [Source:NCBI gene;Acc:415424]
ENSGALG00000048109	6.87198e-95	-1.05269	0.039	0.158	8.22989e-91	DOWN	ENSGALG00000048109
HERPUD1	7.34562e-94	-0.92119	0.138	0.311	8.79712e-90	DOWN	HERPUD1	11	homocysteine inducible ER protein with ubiquitin like domain 1 [Source:NCBI gene;Acc:415644]
ND1	1.32828e-91	-0.752079	0.295	0.502	1.59074e-87	DOWN	ND1	MT	NADH dehydrogenase subunit 1 [Source:NCBI gene;Acc:39116926]
RNASEK	2.22512e-83	-0.874068	0.101	0.249	2.6648e-79	DOWN	RNASEK	31	ribonuclease K [Source:NCBI gene;Acc:107051485]
CHCHD2P9	4.07042e-81	-0.565458	0.64	0.744	4.87474e-77	DOWN	CHCHD2P9	19	coiled-coil-helix-coiled-coil-helix domain containing 2 pseudogene 9 [Source:NCBI gene;Acc:417544]
REEP5	2.54233e-77	-0.861329	0.112	0.256	3.04469e-73	DOWN	REEP5	Z	receptor accessory protein 5 [Source:NCBI gene;Acc:770021]
GPX3	4.38831e-76	-0.70557	0.293	0.472	5.25544e-72	DOWN	GPX3	13	glutathione peroxidase 3 [Source:NCBI gene;Acc:427638]
ATP5A1Z	6.56103e-75	-0.906789	0.071	0.193	7.85749e-71	DOWN	ATP5A1Z
ENSGALG00000042103	8.80695e-75	1.37173	0.125	0.024	1.05472e-70	UP	C5H11ORF96	5	chromosome 5 open reading frame, human C11orf96 [Source:NCBI gene;Acc:770209]
NPTX2	5.66614e-74	-0.906095	0.084	0.213	6.78576e-70	DOWN	NPTX2	14	neuronal pentraxin 2 [Source:NCBI gene;Acc:416438]
ENSGALG00000016392	1.01305e-73	0.598428	0.638	0.521	1.21323e-69	UP	RPS7	3	ribosomal protein S7 [Source:NCBI gene;Acc:421919]
PHKG1	1.53084e-73	0.636657	0.463	0.282	1.83333e-69	UP	PHKG1
JUND	1.73652e-72	-0.833281	0.027	0.117	2.07966e-68	DOWN	JUND
TXNIP	1.20367e-70	1.14252	0.275	0.137	1.44151e-66	UP	TXNIP	25	thioredoxin interacting protein [Source:HGNC Symbol;Acc:HGNC:16952]
ND4	4.04545e-70	-0.623542	0.363	0.547	4.84483e-66	DOWN	ND4	MT	NADH dehydrogenase subunit 4 [Source:NCBI gene;Acc:39116916]
TNFAIP8	4.66539e-67	-0.628639	0.302	0.477	5.58728e-63	DOWN	TNFAIP8	Z	TNF alpha induced protein 8 [Source:NCBI gene;Acc:427384]
ENSGALG00000042748	6.61545e-64	-0.843304	0.042	0.135	7.92266e-60	DOWN	ENSGALG00000042748	22	pulmonary surfactant-associated protein B-like [Source:NCBI gene;Acc:425940]
ENSGALG00000027151	3.39634e-62	-0.515485	0.465	0.63	4.06746e-58	DOWN	FKBP1A	20	FK506 binding protein 1A [Source:NCBI gene;Acc:374233]
HMGB2	7.01672e-60	1.11654	0.147	0.048	8.40322e-56	UP	HMGB2	4	high mobility group box 2 [Source:NCBI gene;Acc:396482]
ENSGALG00000052986	9.94222e-60	1.01263	0.208	0.092	1.19068e-55	UP	ENSGALG00000052986	9
BHLHE40	4.5892e-59	0.988434	0.27	0.142	5.49602e-55	UP	BHLHE40	12	basic helix-loop-helix family member e40 [Source:NCBI gene;Acc:416108]
IRF1	1.79204e-57	-0.818335	0.127	0.251	2.14614e-53	DOWN	IRF1	13	interferon regulatory factor 1 [Source:NCBI gene;Acc:396384]
STMN2	6.3762e-56	0.863	0.292	0.168	7.63613e-52	UP	STMN2	2	stathmin 2 [Source:NCBI gene;Acc:396095]
HIST1H46	3.31192e-55	0.725378	0.658	0.558	3.96636e-51	UP	HIST1H46	1	histone cluster 1, H4-VI, germinal H4 (similar to human histone cluster 1, class H4 genes) [Source:NCBI gene;Acc:417946]
TAGLN3	3.94048e-54	0.942857	0.241	0.126	4.71911e-50	UP	TAGLN3	1	transgelin 3 [Source:NCBI gene;Acc:418420]
ENSGALG00000042491	1.42557e-52	0.978752	0.45	0.332	1.70727e-48	UP	ENSGALG00000042491	1	histone cluster 1, H4d [Source:NCBI gene;Acc:427884]
TBCA	1.77823e-52	-0.70822	0.088	0.195	2.1296e-48	DOWN	TBCA
DCTN3	2.22294e-50	-0.681366	0.117	0.231	2.6622e-46	DOWN	DCTN3	Z	dynactin subunit 3 [Source:NCBI gene;Acc:427404]
MIF	5.49201e-50	-0.639755	0.353	0.479	6.57723e-46	DOWN	MIF	15	macrophage migration inhibitory factor (glycosylation-inhibiting factor) [Source:NCBI gene;Acc:100857237]
ND5	9.9701e-50	-0.579611	0.294	0.444	1.19402e-45	DOWN	ND5	MT	NADH-ubiquinone oxidoreductase chain 5 [Source:UniProtKB/Swiss-Prot;Acc:P18940]
H2A-VIII	1.09903e-49	1.08506	0.254	0.143	1.31619e-45	UP	H2A-VIII	1	histone cluster 1, H2A, III (similar to human histone cluster 2, class H2A, member C) [Source:NCBI gene;Acc:427881]
MT-ND2	2.87475e-47	-0.566973	0.168	0.296	3.4428e-43	DOWN	MT-ND2	MT	NADH-ubiquinone oxidoreductase chain 2 [Source:UniProtKB/Swiss-Prot;Acc:P18937]
ENSGALG00000000812	1.10292e-46	-0.666321	0.072	0.165	1.32085e-42	DOWN	OAZ1	28	ornithine decarboxylase antizyme 1 [Source:NCBI gene;Acc:395746]
EEF1A2	1.85004e-46	-0.541954	0.254	0.394	2.2156e-42	DOWN	EEF1A2	20	eukaryotic translation elongation factor 1 alpha 2 [Source:NCBI gene;Acc:419244]
PPDPF	3.09776e-46	-0.604005	0.177	0.305	3.70987e-42	DOWN	PPDPF	20	pancreatic progenitor cell differentiation and proliferation factor [Source:NCBI gene;Acc:419245]
CALB2	2.40292e-44	-0.649667	0.098	0.199	2.87774e-40	DOWN	CALB2	11	calbindin 2 [Source:NCBI gene;Acc:396255]
CLTA	4.16405e-44	-0.689368	0.064	0.149	4.98686e-40	DOWN	CLTA
HIST1H103	2.87106e-43	1.01408	0.172	0.082	3.43838e-39	UP	HIST1H103	1	histone cluster 1, H1.03 (similar to human histone cluster 1, class H1 genes) [Source:NCBI gene;Acc:100858354]
TUBB4B	4.73948e-43	0.829603	0.362	0.262	5.676e-39	UP	TUBB4B	17	tubulin beta 4B class IVb [Source:NCBI gene;Acc:417255]
BAG3	4.87934e-43	-0.580361	0.186	0.309	5.84349e-39	DOWN	BAG3	6	BCL2 associated athanogene 3 [Source:NCBI gene;Acc:423931]
MBNL3	5.16444e-42	0.674725	0.388	0.28	6.18493e-38	UP	MBNL3	4	muscleblind like splicing regulator 3 [Source:NCBI gene;Acc:422233]
ENSGALG00000049751	1.02912e-39	0.980089	0.295	0.197	1.23247e-35	UP	ENSGALG00000049751	1	histone cluster 1, H2bf [Source:NCBI gene;Acc:769973]
PTP4A1	1.03498e-39	0.872827	0.145	0.064	1.2395e-35	UP	PTP4A1
NBL1	2.83394e-39	0.812613	0.169	0.083	3.39392e-35	UP	NBL1	21	neuroblastoma 1, DAN family BMP antagonist [Source:NCBI gene;Acc:373952]
PKIB	3.28846e-39	0.609557	0.394	0.291	3.93826e-35	UP	PKIB	3	protein kinase (cAMP-dependent, catalytic) inhibitor beta [Source:NCBI gene;Acc:769402]
ALDH7A1	5.2654e-39	-0.629889	0.06	0.137	6.30585e-35	DOWN	ALDH7A1
BTG1	7.59979e-39	0.539205	0.543	0.459	9.10151e-35	UP	BTG1	1	BTG anti-proliferation factor 1 [Source:NCBI gene;Acc:396295]
NSA2	3.09035e-38	-0.555191	0.151	0.259	3.701e-34	DOWN	NSA2	Z	NSA2, ribosome biogenesis homolog [Source:NCBI gene;Acc:427206]
ENSGALG00000027418	3.99906e-38	-0.556686	0.119	0.217	4.78927e-34	DOWN	ENSGALG00000027418	Z	histidine triad nucleotide binding protein 1 [Source:NCBI gene;Acc:100859112]
GADD45B	4.89841e-36	0.857773	0.284	0.187	5.86633e-32	UP	GADD45B	28	growth arrest and DNA damage inducible beta [Source:NCBI gene;Acc:100859853]
MRPS36	6.2669e-36	-0.609738	0.064	0.138	7.50523e-32	DOWN	MRPS36
ENSGALG00000028135	6.66918e-36	-0.588496	0.046	0.113	7.98701e-32	DOWN	ENSGALG00000028135
RAD23A	1.13324e-35	-0.502062	0.27	0.394	1.35717e-31	DOWN	RAD23A	30	RAD23 homolog A, nucleotide excision repair protein [Source:NCBI gene;Acc:100859241]
ENSGALG00000028627	2.24267e-35	0.786068	0.209	0.119	2.68582e-31	UP	TIMP3	1	TIMP metallopeptidase inhibitor 3 [Source:NCBI gene;Acc:396483]
ENSGALG00000052072	2.5221e-34	-0.533435	0.048	0.114	3.02046e-30	DOWN	ANKRD39
ANKRD39	1.71527e-33	-0.609217	0.05	0.116	2.0542e-29	DOWN	IER3IP1
IER3IP1	3.28904e-33	-0.521328	0.135	0.232	3.93895e-29	DOWN	IER3IP1	Z	immediate early response 3 interacting protein 1 [Source:NCBI gene;Acc:101749130]
MID1IP1	1.12712e-32	0.902704	0.129	0.06	1.34983e-28	UP	MID1IP1	1	MID1 interacting protein 1 [Source:NCBI gene;Acc:404752]
TSHB	2.46567e-32	0.806202	0.156	0.08	2.95289e-28	UP	TSHB	26	thyroid stimulating hormone beta [Source:NCBI gene;Acc:395937]
DUSP10	4.42705e-32	0.809912	0.146	0.072	5.30184e-28	UP	DUSP10	3	dual specificity phosphatase 10 [Source:NCBI gene;Acc:421340]
HMGN4	2.963e-28	0.640697	0.24	0.158	3.54849e-24	UP	HMGN4	23	high mobility group nucleosomal binding domain 4 [Source:NCBI gene;Acc:768675]
GM2A	4.63355e-28	0.669962	0.205	0.127	5.54914e-24	UP	GM2A	13	GM2 ganglioside activator [Source:HGNC Symbol;Acc:HGNC:4367]
TPM2	5.45385e-28	-0.504917	0.109	0.189	6.53153e-24	DOWN	TPM2	Z	tropomyosin 2 [Source:NCBI gene;Acc:396430]
GADD45A	7.29844e-28	0.748445	0.215	0.138	8.74061e-24	UP	GADD45A	8	growth arrest and DNA damage inducible alpha [Source:NCBI gene;Acc:693255]
DNAJA1	6.36359e-27	-0.535524	0.053	0.112	7.62104e-23	DOWN	DNAJA1
ENSGALG00000051297	7.55499e-27	0.803705	0.151	0.084	9.04785e-23	UP	ENSGALG00000051297	1
ENSGALG00000014726	1.44215e-26	-0.514547	0.127	0.21	1.72712e-22	DOWN	RAB3C	Z	RAB3C, member RAS oncogene family [Source:NCBI gene;Acc:770370]
ENSGALG00000005774	4.00194e-26	-0.558219	0.104	0.178	4.79272e-22	DOWN	ENSGALG00000005774	20	Na+/K+ transporting ATPase interacting 4 [Source:NCBI gene;Acc:419240]
ZBTB38	4.09454e-25	-0.500734	0.081	0.147	4.90362e-21	DOWN	ZBTB38	9	zinc finger and BTB domain containing 38 [Source:NCBI gene;Acc:424783]
BSG	7.8701e-23	0.549524	0.247	0.174	9.42523e-19	UP	BSG	28	basigin (Ok blood group) [Source:NCBI gene;Acc:770363]
SDC4	2.49319e-22	0.696972	0.17	0.105	2.98585e-18	UP	SDC4	20	syndecan 4 [Source:NCBI gene;Acc:419184]
TSC22D4	7.26835e-21	0.69667	0.183	0.119	8.70458e-17	UP	TSC22D4	4	TSC22 domain family member 4 [Source:NCBI gene;Acc:768091]
HSBP1L1	5.14083e-20	0.541404	0.123	0.068	6.15666e-16	UP	HSBP1L1	2	heat shock factor binding protein 1 like 1 [Source:NCBI gene;Acc:420812]
SREBF2	5.68074e-20	0.646458	0.108	0.057	6.80325e-16	UP	SREBF2	1	sterol regulatory element binding transcription factor 2 [Source:NCBI gene;Acc:395304]
ODC1	2.97395e-18	0.600752	0.117	0.067	3.5616e-14	UP	ODC1
ENSGALG00000033925	1.48573e-15	0.527102	0.143	0.094	1.77931e-11	UP	ENSGALG00000033925	4	uncharacterized LOC422895 [Source:NCBI gene;Acc:422895]
TUBB2B	2.75481e-15	0.606632	0.282	0.231	3.29916e-11	UP	TUBB2B	2	tubulin beta 2B class IIb [Source:NCBI gene;Acc:420883]
ENSGALG00000011921	1.11799e-14	0.634019	0.174	0.124	1.33891e-10	UP	DHRS7	5	dehydrogenase/reductase 7 [Source:NCBI gene;Acc:423527]
ENSGALG00000042023	1.98676e-12	0.544031	0.16	0.116	2.37934e-08	UP	ENSGALG00000042023	1

## Sheet: FS
name	p_val	avg_log2FC	pct.1	pct.2	p_val_adj	change	gene	chromosome_name	description
HBA1	2.75186e-134	-4.32341	0.062	0.884	3.29563e-130	DOWN	HBA1	14	hemoglobin subunit alpha 1 [Source:NCBI gene;Acc:416652]
GRP	4.59299e-120	3.15806	0.885	0.335	5.50057e-116	UP	GRP	Z	gastrin releasing peptide [Source:NCBI gene;Acc:425213]
ENSGALG00000050515	1.55219e-94	-3.22424	0.11	0.781	1.8589e-90	DOWN	ENSGALG00000050515	KZ626833.1	collagen alpha-2(IV) chain-like [Source:NCBI gene;Acc:107051274]
HBBA	9.8131e-87	-3.94695	0.031	0.672	1.17522e-82	DOWN	HBBA	1	hemoglobin beta, subunit A [Source:NCBI gene;Acc:396485]
HINTW	4.7084e-80	3.98372	0.39	0	5.63878e-76	UP	HINTW	W	histidine triad nucleotide binding protein W [Source:NCBI gene;Acc:395423]
HBAD	1.29285e-49	-3.76835	0.008	0.432	1.54832e-45	DOWN	HBAD	14	hemoglobin alpha, subunit D [Source:NCBI gene;Acc:416651]
POMC	1.05312e-45	-0.657451	0.128	0.584	1.26122e-41	DOWN	POMC	3	proopiomelanocortin [Source:NCBI gene;Acc:422011]
SNCG	9.59003e-35	2.44524	0.346	0.078	1.1485e-30	UP	SNCG	6	synuclein gamma [Source:NCBI gene;Acc:395392]
ENSGALG00000040263	7.48997e-34	2.63459	0.172	0	8.96999e-30	UP	ENSGALG00000040263	W	60S ribosomal protein L17 [Source:NCBI gene;Acc:107049046]
LHB	7.00149e-33	-1.40899	0.282	0.662	8.38498e-29	DOWN	LHB		0
ATF3	4.03597e-25	1.54317	0.518	0.254	4.83347e-21	UP	ATF3	3	activating transcription factor 3 [Source:NCBI gene;Acc:421369]
ENSGALG00000026970	4.742e-25	2.2326	0.2	0.026	5.67902e-21	UP	ENSGALG00000026970	5	interferon-induced transmembrane protein 1-like [Source:NCBI gene;Acc:770612]
ENSGALG00000049450	2.89568e-23	-2.46574	0.033	0.28	3.46787e-19	DOWN	ENSGALG00000049450	15	immunoglobulin lambda like polypeptide 1 [Source:HGNC Symbol;Acc:HGNC:5870]
B2M	1.48764e-21	-0.976202	0.456	0.726	1.7816e-17	DOWN	B2M	10	beta-2-microglobulin [Source:NCBI gene;Acc:414830]
CST3	5.72217e-21	-0.674694	0.9	0.969	6.85288e-17	DOWN	CST3	3	cystatin C [Source:NCBI gene;Acc:396497]
ENSGALG00000015617	4.11828e-20	-0.787661	0.587	0.79	4.93205e-16	DOWN	RPS23	Z	ribosomal protein S23 [Source:NCBI gene;Acc:427323]
COX7C	1.09775e-18	-1.02032	0.346	0.625	1.31466e-14	DOWN	COX7C	Z	cytochrome c oxidase subunit 7C [Source:NCBI gene;Acc:431629]
RPS6	3.96328e-18	-1.02386	0.303	0.59	4.74642e-14	DOWN	RPS6	Z	ribosomal protein S6 [Source:NCBI gene;Acc:396148]
FOS	5.16084e-17	0.666952	0.864	0.783	6.18062e-13	UP	FOS	5	Fos proto-oncogene, AP-1 transcription factor subunit [Source:NCBI gene;Acc:396512]
ENSGALG00000042103	1.53952e-16	2.01287	0.146	0.023	1.84373e-12	UP	C5H11ORF96	5	chromosome 5 open reading frame, human C11orf96 [Source:NCBI gene;Acc:770209]
HSPA8	1.87976e-16	-1.01198	0.321	0.583	2.2512e-12	DOWN	HSPA8	24	heat shock 70kDa protein 8 [Source:NCBI gene;Acc:395853]
ATP5I	8.01124e-16	-0.991372	0.274	0.523	9.59426e-12	DOWN	ATP5I	Z	ATP synthase, H+ transporting, mitochondrial Fo complex subunit E [Source:NCBI gene;Acc:769146]
TUBA1A	9.71006e-15	1.15701	0.459	0.269	1.16288e-10	UP	TUBA1A	33	tubulin alpha 1a [Source:NCBI gene;Acc:429035]
ENSGALG00000037805	1.69331e-14	0.532595	0.862	0.77	2.02791e-10	UP	RPS19	KZ626826.1	ribosomal protein S19 [Source:NCBI gene;Acc:107050719]
BTG2	3.99948e-13	0.887881	0.582	0.432	4.78978e-09	UP	BTG2	26	BTG anti-proliferation factor 2 [Source:NCBI gene;Acc:419932]
CYTB	1.24602e-12	-0.649604	0.518	0.749	1.49223e-08	DOWN	CYTB	MT	cytochrome b [Source:NCBI gene;Acc:39116918]
TSC22D4	6.54927e-12	1.48832	0.226	0.09	7.8434e-08	UP	TSC22D4	4	TSC22 domain family member 4 [Source:NCBI gene;Acc:768091]
ENSGALG00000008661	9.98898e-12	1.61987	0.149	0.04	1.19628e-07	UP	CYR61	8	cysteine rich angiogenic inducer 61 [Source:NCBI gene;Acc:429089]
ID3	2.93601e-11	1.12234	0.346	0.19	3.51617e-07	UP	ID3	23	inhibitor of DNA binding 3, HLH protein [Source:NCBI gene;Acc:395281]
RPS28	3.78502e-11	0.519827	0.838	0.765	4.53294e-07	UP	RPS28	28	ribosomal protein S28 [Source:NCBI gene;Acc:768930]
GADD45B	8.8394e-11	1.34179	0.241	0.107	1.05861e-06	UP	GADD45B	28	growth arrest and DNA damage inducible beta [Source:NCBI gene;Acc:100859853]
DUSP1	1.05439e-10	1.2772	0.277	0.135	1.26274e-06	UP	DUSP1	13	dual specificity phosphatase 1 [Source:NCBI gene;Acc:374192]
JCHAIN	2.22012e-10	-1.69553	0.018	0.133	2.65882e-06	DOWN	JCHAIN	4	joining chain of multimeric IgA and IgM [Source:NCBI gene;Acc:374117]
WNT5A	2.24381e-10	-0.959011	0.195	0.383	2.68718e-06	DOWN	WNT5A	12	Wnt family member 5A [Source:NCBI gene;Acc:395703]
NPY	3.13193e-10	-1.64995	0.031	0.156	3.7508e-06	DOWN	NPY	2	neuropeptide Y [Source:NCBI gene;Acc:396464]
RPL17	9.10632e-10	-0.684172	0.379	0.575	1.09057e-05	DOWN	RPL17	Z	ribosomal protein L17 [Source:NCBI gene;Acc:426845]
HSPB9	1.88471e-09	0.668685	0.672	0.562	2.25712e-05	UP	HSPB9	27	heat shock protein family B (small) member 9 [Source:NCBI gene;Acc:428310]
BLB2	3.39617e-09	-1.07547	0.097	0.244	4.06725e-05	DOWN	BLB2	16	Major histocompatibility complex class II beta chain BLB2, (similar to HLA class II, D beta chain) [Source:NCBI gene;Acc:101747454]
RHOB	1.4768e-08	1.04945	0.285	0.162	0.000176861	UP	RHOB	3	ras homolog family member B [Source:NCBI gene;Acc:395734]
HINT2	1.5593e-08	-0.926079	0.069	0.202	0.000186742	DOWN	HINT2	Z	histidine triad nucleotide binding protein 2 [Source:NCBI gene;Acc:395424]
IFI6	1.66588e-08	-1.08338	0.118	0.268	0.000199506	DOWN	IFI6	2	interferon alpha inducible protein 6 [Source:NCBI gene;Acc:403120]
GPX1	2.24202e-08	-1.31446	0.033	0.141	0.000268505	DOWN	GPX1	12	glutathione peroxidase 1 [Source:NCBI gene;Acc:100857115]
VIM	2.2447e-08	-0.904463	0.1	0.247	0.000268826	DOWN	VIM	2	vimentin [Source:NCBI gene;Acc:420519]
ACTG1	2.75484e-08	0.623997	0.59	0.474	0.00032992	UP	ACTG1	18	actin, cytoplasmic 2-like [Source:NCBI gene;Acc:776816]
ACTB	3.92613e-08	0.577062	0.682	0.621	0.000470193	UP	ACTB	14	actin, beta [Source:NCBI gene;Acc:396526]
MT-ND2	5.71828e-08	-0.786985	0.21	0.381	0.000684821	DOWN	MT-ND2	MT	NADH-ubiquinone oxidoreductase chain 2 [Source:UniProtKB/Swiss-Prot;Acc:P18937]

## Sheet: Thy
name	p_val	avg_log2FC	pct.1	pct.2	p_val_adj	change	gene	chromosome_name	description
HBA1	4.01965e-77	-4.80708	0.102	0.943	4.81393e-73	DOWN	HBA1	14	hemoglobin subunit alpha 1 [Source:NCBI gene;Acc:416652]
HBBA	1.93313e-75	-4.08304	0.04	0.816	2.31512e-71	DOWN	HBBA	1	hemoglobin beta, subunit A [Source:NCBI gene;Acc:396485]
ENSGALG00000050515	1.14363e-54	-3.61845	0.183	0.897	1.36961e-50	DOWN	ENSGALG00000050515	KZ626833.1	collagen alpha-2(IV) chain-like [Source:NCBI gene;Acc:107051274]
HBAD	1.97565e-51	-3.56496	0.017	0.54	2.36604e-47	DOWN	HBAD	14	hemoglobin alpha, subunit D [Source:NCBI gene;Acc:416651]
GRP	1.78057e-33	2.59765	0.94	0.379	2.13241e-29	UP	GRP	Z	gastrin releasing peptide [Source:NCBI gene;Acc:425213]
CGA	3.42617e-29	1.46436	1	0.989	4.10318e-25	UP	CGA	3	glycoprotein hormones, alpha polypeptide [Source:NCBI gene;Acc:421829]
ENSGALG00000049450	9.77684e-29	-2.42104	0.03	0.391	1.17087e-24	DOWN	ENSGALG00000049450	15	immunoglobulin lambda like polypeptide 1 [Source:HGNC Symbol;Acc:HGNC:5870]
POMC	1.24937e-25	-1.87806	0.172	0.655	1.49624e-21	DOWN	POMC	3	proopiomelanocortin [Source:NCBI gene;Acc:422011]
LHB	1.08282e-23	-2.0556	0.351	0.805	1.29679e-19	DOWN	LHB
JCHAIN	2.90777e-19	-1.78558	0.026	0.287	3.48234e-15	DOWN	JCHAIN	4	joining chain of multimeric IgA and IgM [Source:NCBI gene;Acc:374117]
PRL	1.07952e-18	-0.829599	0.87	1	1.29283e-14	DOWN	PRL	2	prolactin [Source:NCBI gene;Acc:396453]
COX3	3.38122e-18	-0.881189	0.972	1	4.04935e-14	DOWN	COX3	MT	cytochrome c oxidase subunit III [Source:NCBI gene;Acc:39116913]
HINTW	5.16846e-17	3.23833	0.511	0	6.18975e-13	UP	HINTW	W	histidine triad nucleotide binding protein W [Source:NCBI gene;Acc:395423]
ENSGALG00000015617	6.16498e-17	-1.05361	0.789	0.966	7.38318e-13	DOWN	RPS23	Z	ribosomal protein S23 [Source:NCBI gene;Acc:427323]
HSPA8	6.98686e-17	-1.76691	0.54	0.839	8.36746e-13	DOWN	HSPA8	24	heat shock 70kDa protein 8 [Source:NCBI gene;Acc:395853]
TSHB	2.24478e-16	1.29937	0.966	0.839	2.68835e-12	UP	TSHB	26	thyroid stimulating hormone beta [Source:NCBI gene;Acc:395937]
HSPA2	3.2037e-16	-1.53143	0.617	0.874	3.83675e-12	DOWN	HSPA2	5	heat shock 70kDa protein 2 [Source:NCBI gene;Acc:423504]
FOS	1.81893e-14	-1.4988	0.64	0.885	2.17835e-10	DOWN	FOS	5	Fos proto-oncogene, AP-1 transcription factor subunit [Source:NCBI gene;Acc:396512]
RASL10A	3.22831e-14	-2.24022	0.015	0.195	3.86622e-10	DOWN	RASL10A
COX7C	6.40252e-14	-1.10454	0.721	0.885	7.66765e-10	DOWN	COX7C	Z	cytochrome c oxidase subunit 7C [Source:NCBI gene;Acc:431629]
COII	1.05598e-13	-0.816745	0.909	0.966	1.26464e-09	DOWN	COII	MT	Cytochrome c oxidase subunit 2 [Source:UniProtKB/Swiss-Prot;Acc:P18944]
CYTB	3.87837e-13	-1.15764	0.583	0.851	4.64474e-09	DOWN	CYTB	MT	cytochrome b [Source:NCBI gene;Acc:39116918]
ACTB	6.25324e-13	-1.1992	0.517	0.828	7.48889e-09	DOWN	ACTB	14	actin, beta [Source:NCBI gene;Acc:396526]
MT-CO1	9.44879e-13	-0.712265	0.945	0.989	1.13159e-08	DOWN	MT-CO1	MT	Cytochrome c oxidase subunit 1 [Source:UniProtKB/Swiss-Prot;Acc:P18943]
MT-ND2	1.46836e-11	-1.4985	0.183	0.494	1.75851e-07	DOWN	MT-ND2	MT	NADH-ubiquinone oxidoreductase chain 2 [Source:UniProtKB/Swiss-Prot;Acc:P18937]
CRABP-I	2.87053e-11	-1.69954	0.009	0.138	3.43775e-07	DOWN	CRABP-I
ENSGALG00000026970	3.21116e-11	2.31134	0.402	0.023	3.84569e-07	UP	ENSGALG00000026970	5	interferon-induced transmembrane protein 1-like [Source:NCBI gene;Acc:770612]
EGR1	1.29872e-10	-1.18385	0.334	0.667	1.55535e-06	DOWN	EGR1	13	early growth response 1 [Source:NCBI gene;Acc:373931]
RPS6	2.00919e-10	-0.935711	0.623	0.793	2.40621e-06	DOWN	RPS6	Z	ribosomal protein S6 [Source:NCBI gene;Acc:396148]
ENSGALG00000015543	2.29847e-10	-1.26682	0.032	0.207	2.75265e-06	DOWN	ENSGALG00000015543
JUN	5.33783e-10	-1.12597	0.472	0.724	6.39258e-06	DOWN	JUN	8	Jun proto-oncogene, AP-1 transcription factor subunit [Source:NCBI gene;Acc:424673]
ENSGALG00000053886	2.09192e-09	-0.873918	0.028	0.184	2.50528e-05	DOWN	ENSGALG00000053886	Z
ENSGALG00000040263	2.22444e-09	2.07356	0.313	0	2.66399e-05	UP	ENSGALG00000040263	W	60S ribosomal protein L17 [Source:NCBI gene;Acc:107049046]
FTH1	2.77579e-09	-0.929468	0.726	0.851	3.32428e-05	DOWN	FTH1	5	ferritin heavy chain 1 [Source:NCBI gene;Acc:395970]
HSP90AA1	1.79527e-08	-0.873056	0.67	0.816	0.000215001	DOWN	HSP90AA1	5	heat shock protein 90 alpha family class A member 1 [Source:NCBI gene;Acc:423463]
IFI27L2	2.47353e-08	-1.95861	0.03	0.172	0.00029623	DOWN	IFI27L2	23	interferon, alpha-inducible protein 27-like 2 [Source:NCBI gene;Acc:403121]
ATP6	3.11449e-08	-0.706646	0.866	0.92	0.000372992	DOWN	ATP6	MT	ATP synthase F0 subunit 6 [Source:NCBI gene;Acc:39116912]
ATP5I	3.30904e-08	-0.948761	0.479	0.713	0.000396291	DOWN	ATP5I	Z	ATP synthase, H+ transporting, mitochondrial Fo complex subunit E [Source:NCBI gene;Acc:769146]
ENSGALG00000053921	5.40701e-08	-0.66753	0.026	0.161	0.000647544	DOWN	ENSGALG00000053921	3	uncharacterized LOC112532140 [Source:NCBI gene;Acc:112532140]

## Sheet: Cort
name	p_val	avg_log2FC	pct.1	pct.2	p_val_adj	change	gene	chromosome_name	description
HBA1	7.83435e-50	-4.21879	0.11	0.923	9.38241e-46	DOWN	HBA1	14	hemoglobin subunit alpha 1 [Source:NCBI gene;Acc:416652]
ENSGALG00000050515	2.6198e-42	-4.1823	0.102	0.848	3.13748e-38	DOWN	ENSGALG00000050515	KZ626833.1	collagen alpha-2(IV) chain-like [Source:NCBI gene;Acc:107051274]
GRP	2.8144e-42	2.37973	0.941	0.35	3.37053e-38	UP	GRP	Z	gastrin releasing peptide [Source:NCBI gene;Acc:425213]
HBBA	4.20803e-33	-4.23275	0.017	0.705	5.03954e-29	DOWN	HBBA	1	hemoglobin beta, subunit A [Source:NCBI gene;Acc:396485]
HINTW	1.31382e-30	2.78519	0.347	0	1.57343e-26	UP	HINTW	W	histidine triad nucleotide binding protein W [Source:NCBI gene;Acc:395423]
HBAD	1.03618e-20	-3.29913	0.025	0.53	1.24093e-16	DOWN	HBAD	14	hemoglobin alpha, subunit D [Source:NCBI gene;Acc:416651]
PRL	3.80514e-20	-0.544871	0.822	0.986	4.55703e-16	DOWN	PRL	2	prolactin [Source:NCBI gene;Acc:396453]
COX3	8.01676e-20	-0.961023	0.966	0.991	9.60087e-16	DOWN	COX3	MT	cytochrome c oxidase subunit III [Source:NCBI gene;Acc:39116913]
COX7C	2.24537e-18	-1.28395	0.636	0.865	2.68906e-14	DOWN	COX7C	Z	cytochrome c oxidase subunit 7C [Source:NCBI gene;Acc:431629]
MT-CO1	5.29409e-18	-0.947145	0.881	0.989	6.34021e-14	DOWN	MT-CO1	MT	Cytochrome c oxidase subunit 1 [Source:UniProtKB/Swiss-Prot;Acc:P18943]
ENSGALG00000040263	5.81866e-18	1.84767	0.203	0	6.96843e-14	UP	ENSGALG00000040263	W	60S ribosomal protein L17 [Source:NCBI gene;Acc:107049046]
RPL37	2.22738e-16	-0.8772	0.915	0.963	2.66751e-12	DOWN	RPL37	Z	ribosomal protein L37 [Source:NCBI gene;Acc:427186]
HSPA5	3.34483e-16	-2.8722	0.136	0.559	4.00577e-12	DOWN	HSPA5	17	heat shock 70kDa protein 5 (glucose-regulated protein, 78kDa) [Source:NCBI gene;Acc:396487]
HSPA8	2.09462e-14	-1.28768	0.661	0.871	2.50851e-10	DOWN	HSPA8	24	heat shock 70kDa protein 8 [Source:NCBI gene;Acc:395853]
COII	5.07509e-14	-0.89599	0.898	0.977	6.07793e-10	DOWN	COII	MT	Cytochrome c oxidase subunit 2 [Source:UniProtKB/Swiss-Prot;Acc:P18944]
ENSGALG00000042103	5.42144e-14	1.97416	0.432	0.12	6.49271e-10	UP	C5H11ORF96	5	chromosome 5 open reading frame, human C11orf96 [Source:NCBI gene;Acc:770209]
ATP6	6.43713e-14	-0.905236	0.822	0.94	7.70911e-10	DOWN	ATP6	MT	ATP synthase F0 subunit 6 [Source:NCBI gene;Acc:39116912]
ATP5I	7.80671e-14	-1.64601	0.271	0.642	9.34931e-10	DOWN	ATP5I	Z	ATP synthase, H+ transporting, mitochondrial Fo complex subunit E [Source:NCBI gene;Acc:769146]
ENSGALG00000026970	4.62691e-13	1.76527	0.169	0.006	5.54119e-09	UP	ENSGALG00000026970	5	interferon-induced transmembrane protein 1-like [Source:NCBI gene;Acc:770612]
LHB	6.27262e-13	-1.54364	0.39	0.719	7.51208e-09	DOWN	LHB
RLN3	1.31921e-12	1.69071	0.153	0.003	1.57988e-08	UP	RLN3	Z	relaxin 3 [Source:NCBI gene;Acc:427223]
ENSGALG00000049450	6.03094e-12	-2.88462	0.008	0.327	7.22266e-08	DOWN	ENSGALG00000049450	15	immunoglobulin lambda like polypeptide 1 [Source:HGNC Symbol;Acc:HGNC:5870]
ENSGALG00000015617	1.50441e-10	-0.942432	0.686	0.845	1.80169e-06	DOWN	RPS23	Z	ribosomal protein S23 [Source:NCBI gene;Acc:427323]
POMC	1.50506e-10	0.585132	0.983	0.994	1.80246e-06	UP	POMC	3	proopiomelanocortin [Source:NCBI gene;Acc:422011]
RPS6	1.57861e-09	-1.20221	0.356	0.656	1.89054e-05	DOWN	RPS6	Z	ribosomal protein S6 [Source:NCBI gene;Acc:396148]
CALB2	4.71368e-09	1.11998	0.907	0.716	5.64511e-05	UP	CALB2	11	calbindin 2 [Source:NCBI gene;Acc:396255]
CYTB	3.47037e-08	-0.848149	0.619	0.808	0.000415611	DOWN	CYTB	MT	cytochrome b [Source:NCBI gene;Acc:39116918]

## Sheet: Endo
name	p_val	avg_log2FC	pct.1	pct.2	p_val_adj	change	gene	chromosome_name	description
HBA1	5.18429e-67	-4.88662	0.058	0.852	6.20871e-63	DOWN	HBA1	14	hemoglobin subunit alpha 1 [Source:NCBI gene;Acc:416652]
GRP	5.49077e-53	2.85289	0.894	0.313	6.57575e-49	UP	GRP	Z	gastrin releasing peptide [Source:NCBI gene;Acc:425213]
ENSGALG00000050515	8.82751e-52	-3.4445	0.128	0.806	1.05718e-47	DOWN	ENSGALG00000050515	KZ626833.1	collagen alpha-2(IV) chain-like [Source:NCBI gene;Acc:107051274]
HINTW	1.28309e-48	4.93457	0.58	0	1.53662e-44	UP	HINTW	W	histidine triad nucleotide binding protein W [Source:NCBI gene;Acc:395423]
HBBA	2.21461e-45	-4.28019	0.031	0.662	2.65222e-41	DOWN	HBBA	1	hemoglobin beta, subunit A [Source:NCBI gene;Acc:396485]
ENSGALG00000026970	2.84259e-37	3.22803	0.584	0.067	3.40428e-33	UP	ENSGALG00000026970	5	interferon-induced transmembrane protein 1-like [Source:NCBI gene;Acc:770612]
LHB	2.35421e-30	-1.87841	0.274	0.75	2.8194e-26	DOWN	LHB
HBAD	2.38442e-26	-4.22158	0.004	0.405	2.85558e-22	DOWN	HBAD	14	hemoglobin alpha, subunit D [Source:NCBI gene;Acc:416651]
POMC	9.01349e-23	-2.39278	0.142	0.542	1.07946e-18	DOWN	POMC	3	proopiomelanocortin [Source:NCBI gene;Acc:422011]
GPX3	3.36792e-14	-1.95477	0.128	0.415	4.03342e-10	DOWN	GPX3	13	glutathione peroxidase 3 [Source:NCBI gene;Acc:427638]
MT-CO1	9.37679e-14	-0.696276	0.823	0.926	1.12296e-09	DOWN	MT-CO1	MT	Cytochrome c oxidase subunit 1 [Source:UniProtKB/Swiss-Prot;Acc:P18943]
COX3	1.53022e-13	-0.627665	0.951	0.975	1.83259e-09	DOWN	COX3	MT	cytochrome c oxidase subunit III [Source:NCBI gene;Acc:39116913]
PNMT	3.363e-11	-2.73094	0.044	0.261	4.02753e-07	DOWN	PNMT	27	phenylethanolamine N-methyltransferase [Source:NCBI gene;Acc:100858738]
ENSGALG00000040263	1.28447e-10	2.1293	0.137	0	1.53828e-06	UP	ENSGALG00000040263	W	60S ribosomal protein L17 [Source:NCBI gene;Acc:107049046]
ENSGALG00000015617	1.45896e-10	-0.882523	0.628	0.757	1.74725e-06	DOWN	RPS23	Z	ribosomal protein S23 [Source:NCBI gene;Acc:427323]
RBP7	4.98159e-10	2.1066	0.19	0.025	5.96596e-06	UP	RBP7
ENSGALG00000031430	1.73234e-09	-3.06842	0	0.148	2.07465e-05	DOWN	ENSGALG00000031430
ENSGALG00000042103	1.97244e-09	1.97857	0.456	0.246	2.3622e-05	UP	C5H11ORF96	5	chromosome 5 open reading frame, human C11orf96 [Source:NCBI gene;Acc:770209]
ACTB	7.44846e-09	0.630345	0.894	0.803	8.92027e-05	UP	ACTB	14	actin, beta [Source:NCBI gene;Acc:396526]
FAU	1.39138e-08	0.785889	0.677	0.458	0.000166632	UP	FAU	33	FAU, ubiquitin like and ribosomal protein S30 fusion [Source:NCBI gene;Acc:101749142]
PRL	4.36449e-08	0.515183	0.779	0.958	0.000522691	UP	PRL	2	prolactin [Source:NCBI gene;Acc:396453]
TSC22D4	4.42348e-08	1.01674	0.456	0.222	0.000529756	UP	TSC22D4	4	TSC22 domain family member 4 [Source:NCBI gene;Acc:768091]
ATP6	7.53269e-08	-0.535148	0.796	0.908	0.000902115	DOWN	ATP6	MT	ATP synthase F0 subunit 6 [Source:NCBI gene;Acc:39116912]
H3F3B	7.69967e-08	0.852097	0.681	0.5	0.000922113	UP	H3F3B	18	H3 histone, family 3B [Source:NCBI gene;Acc:396233]
